# Supplementary material for: TWIST1 interacts with β/δ-catenins during neural tube development and regulates fate transition in cranial neural crest cells
Source: Oxford University Press journal article supplement (doi:10.1242/dev.200068), 2022-07-04
Supplement: dev200068supp.pdf [file dev200068supp.pdf]

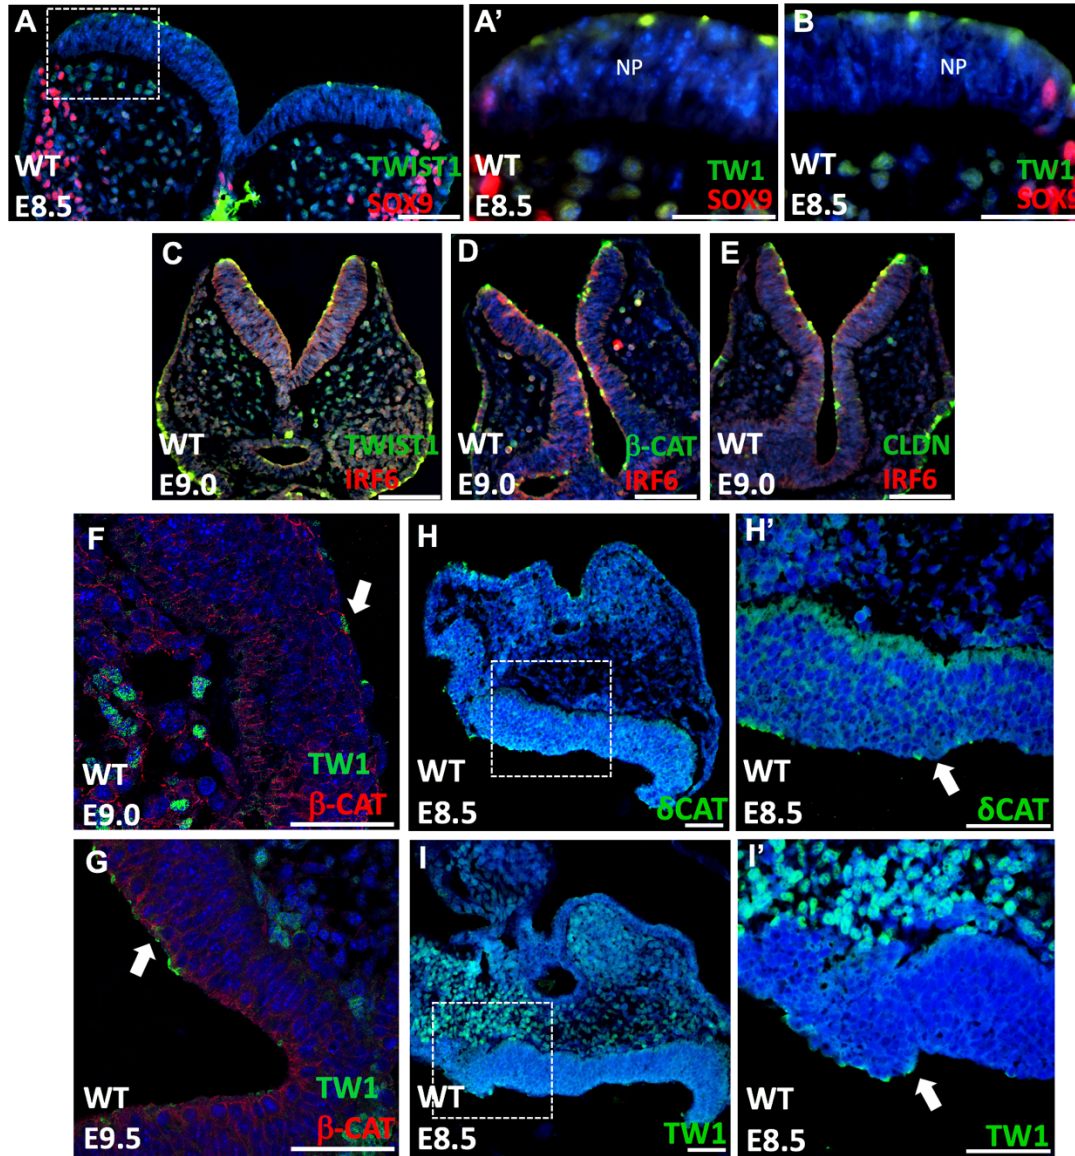

**Fig. S1.** Immunofluorescent staining of TWIST1, SOX9, CLAUDIN, IRF6,  $\beta$ -CATENIN, and  $\delta$ -CATENIN during neural tube development. (A, A', B, C, D) TWIST1 is apically expressed at the dorsal side of the neural plate, similar to CLAUDIN and  $\beta$ -CATENIN. (E) TWIST1 is apically expressed in neural folds and at dorsal edges of neural folds. (F, G) Expression of CLAUDIN and  $\beta$ -CATENIN at the apical side of the neural folds at E9.0. (H, I) Co-expression of TWIST1 and  $\beta$ -CATENIN at the apical side of the neural folds and neural tube. (J-K') TWIST1 and  $\delta$ -CATENIN are expressed in a similar pattern at the apical side of neural folds in consecutive sections.

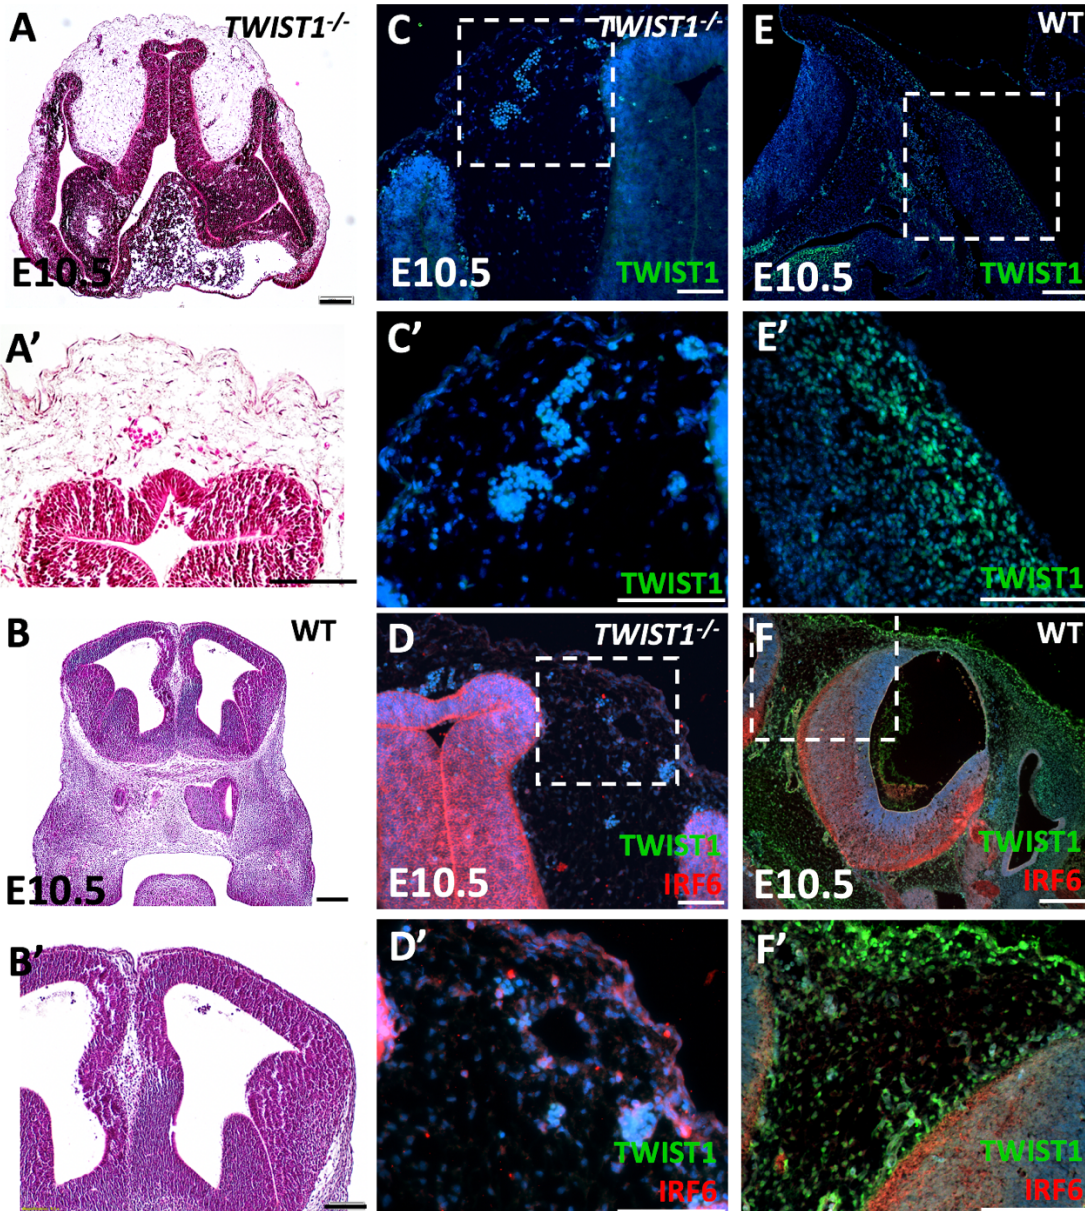

**Fig. S2.** Validation of anti-TWIST1 antibodies in *Twist1* null embryonic tissues. (A, A') Histological staining of coronal section of *Twist1* null embryo showing the morphology of the frontal neural tube and complete loss of nasal and oral tissues at E10.5. (B, B') Histological staining of the coronal/transverse section of wild-type embryo shows the frontal neural tube morphology. (C, C') TWIST1 is not detected in *Twist1* null embryo using monoclonal anti-TWIST1 antibody by IF staining. (D, D') IRF6 is highly expressed in *Twist1* null embryo using dual staining for TWIST1 and IRF6. (E, E') TWIST1 is detected in migratory mesenchymal cells in comparable tissues of wild-type embryos using the same monoclonal antibody and conditions (F, F') IRF6 and TWIST1 are highly expressed in wild-type embryos using the same monoclonal antibody dual staining for TWIST1 and IRF6. Scale bars represent 100  $\mu$ m.

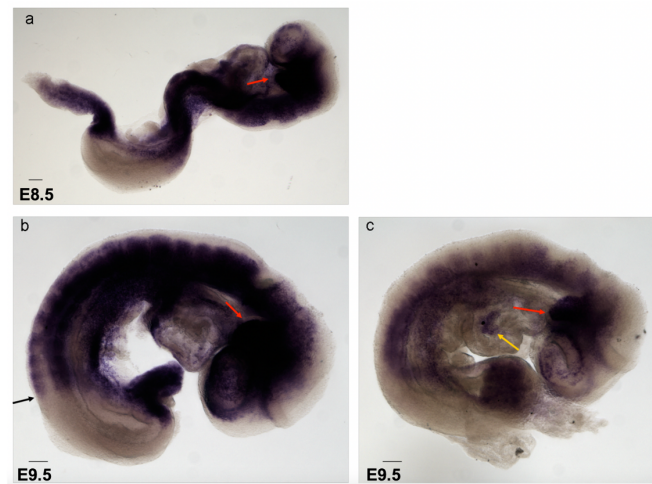

**Fig. S3.** Whole mount *in situ* hybridization for *Twist1* mRNA at E8.5 and E9.5 embryos. The positive staining is depicted in dark purple color in craniofacial, trunk and limb regions. To produce the RNA probe, BAC was extracted from clone bMQ-350m18 (GeneService). PCR primers were designed to amplify a 0.8 kb fragment in the 3' UTR region of *Twist1* gene. The fragment was amplified, subcloned into TOPO, and then sequenced using the M13 primers. Sequencing revealed that clone WOTO2 contained a correct insert which was used to produce a RNA probe complementary to *Twist1* mRNA using the T7 promoter site for transcription. The linearized and purified DNA plasmid was used as a template for T7 RNA polymerase (Roche, 10881767001) and the probe was labeled with the DIG-UTP for the *in situ* hybridization.

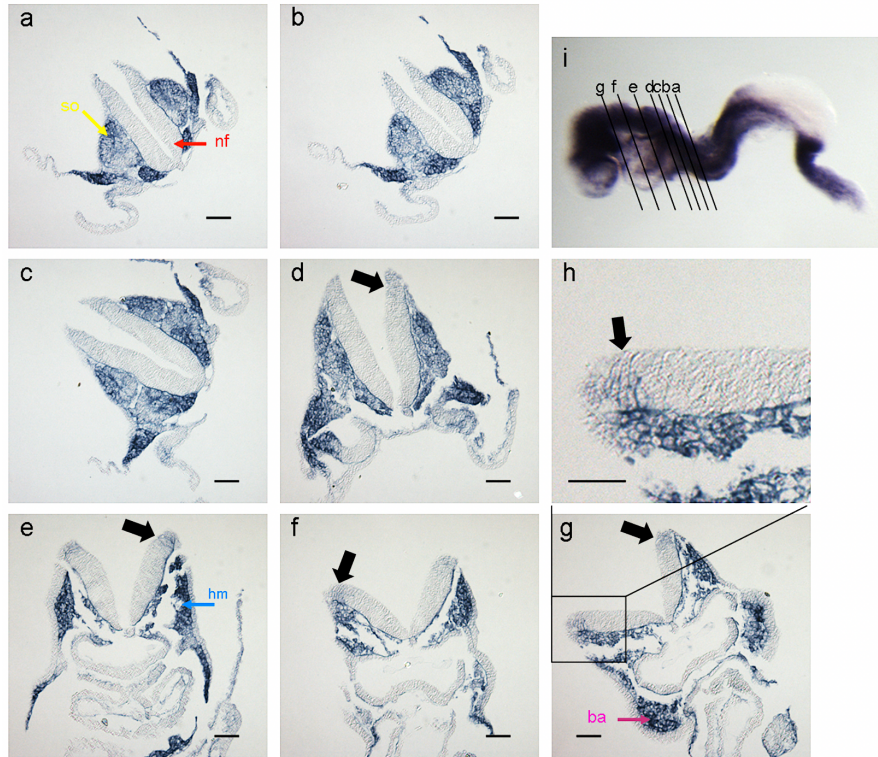

**Fig. S4. *Twist1* is weakly expressed in the dorsal neural plate at E8.5.** Whole mount *in situ* hybridization for *Twist1* of an E8.5 embryo sectioned from posterior to anterior (a to g) as shown in (i). Magnification of the box in (g) focusing on the dorsal neural tube (h). Neural fold (nf, red arrow), somite (so, yellow arrow), head mesenchyme (hm, blue arrow), branchial arch (ba, purple arrow). Scale bars represent 50  $\mu\text{m}$ .

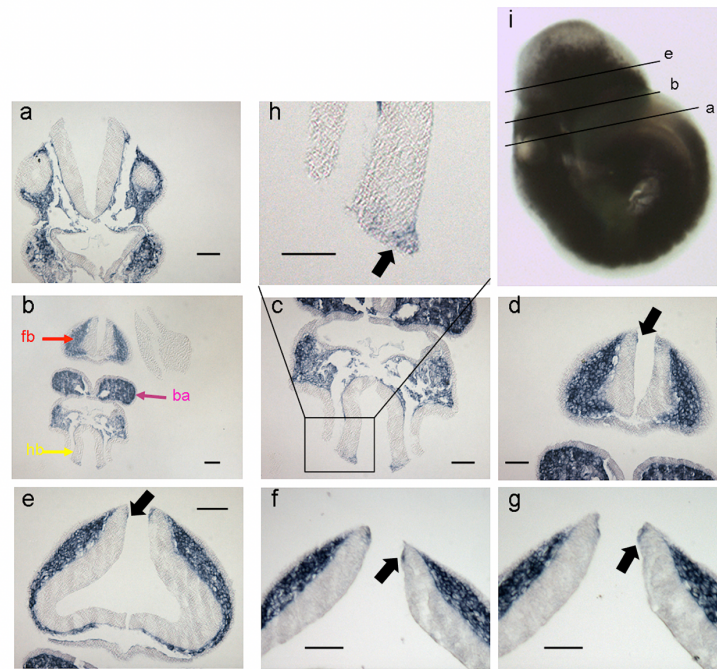

**Fig. S5. *Twist1* is weakly expressed in the dorsal neural fold at E9.5.** Whole mount *in situ* hybridization for *Twist1* of an E9.5 embryo sectioned from posterior to anterior (a to g) as shown in (i). Magnification of the box in (g) focusing on the dorsal neural tube. Forebrain (fb, red arrow), hindbrain (hb, yellow arrow), branchial arch (ba, purple arrow). Scale bars represent 50  $\mu\text{m}$ .

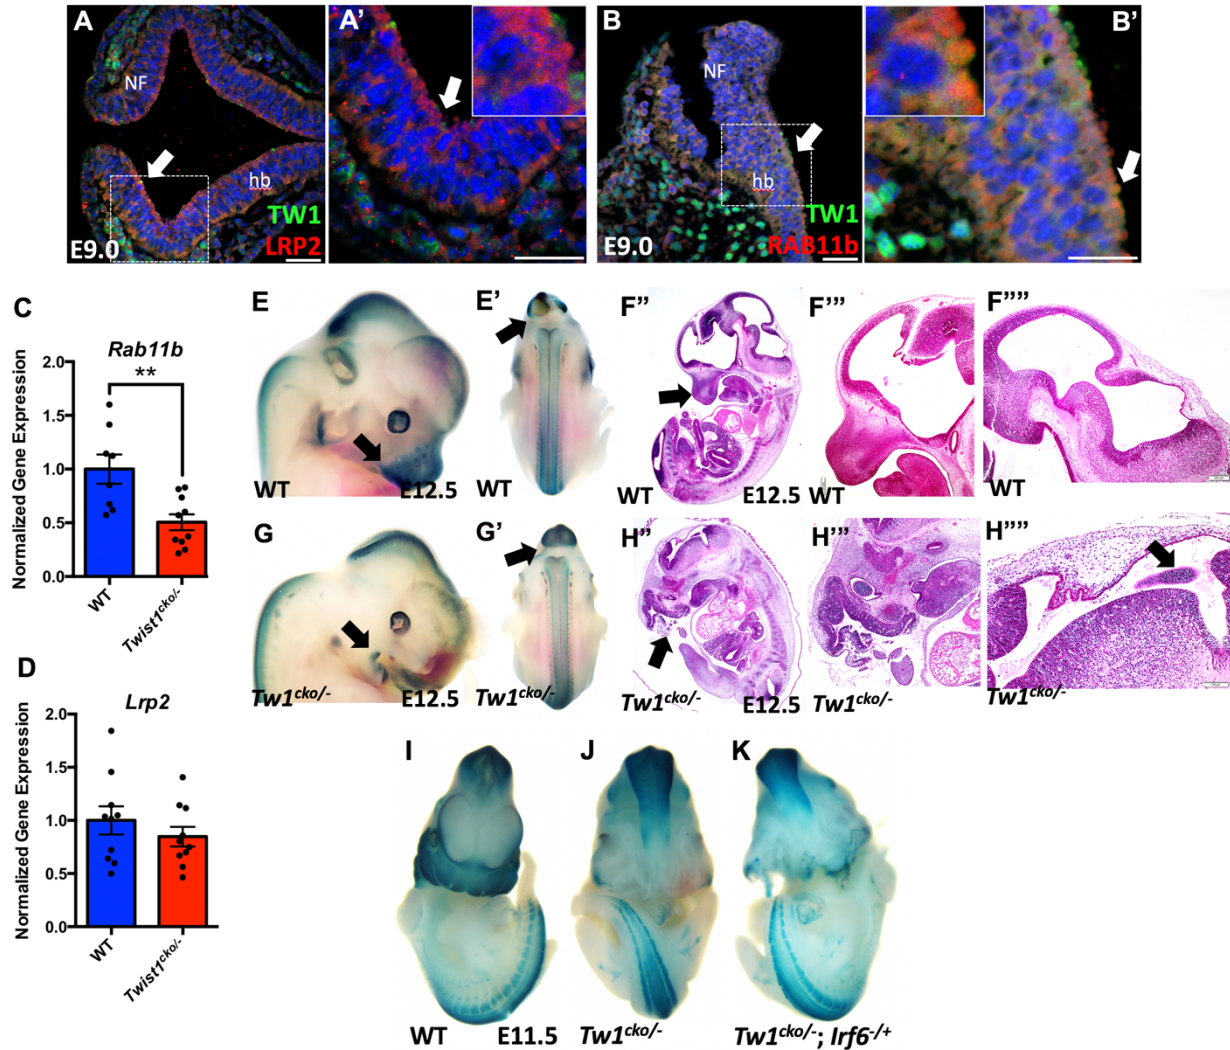

**Fig. S6.** (A, A') Dual immunostaining of TWIST1 in green and LRP2 in red are colocalized at the apical surface of neural folds. (B, B') Dual immunostaining of TWIST1 in green and endocytic marker RAB11b in red partially overlap in compartment vesicles at the apical side of neural fold. (C, D) Normalized expression level of *Lrp2* and *Rab11b* in wild type and *Twist1* CKO hindbrain tissues at E9.5. The whole mount X-gal and histological sections were staining in wild type and *Twist1*<sup>cko/-</sup> mouse embryos at E12.5. (A, A') Whole mount X-gal of WT shows blue staining in frontonasal, jaw processes, midbrain, and trunk neural tube. (A''-A''') Histological staining shows normal brain development in wild type. (B, B') Whole mount X-gal of WT shows blue staining in frontonasal, jaw processes, midbrain, and trunk neural tube. (B''-B''') and severe brain abnormalities in *Twist1*<sup>cko/-</sup> mouse embryos. (C-E) Whole mount X-gal staining of wild type, *Twist1*<sup>cko/-</sup>, and *Twist1*<sup>cko/-</sup>; *Irf6*<sup>+/-</sup> embryos at E11.5. Compound heterozygous embryo shows severe frontonasal deformities.

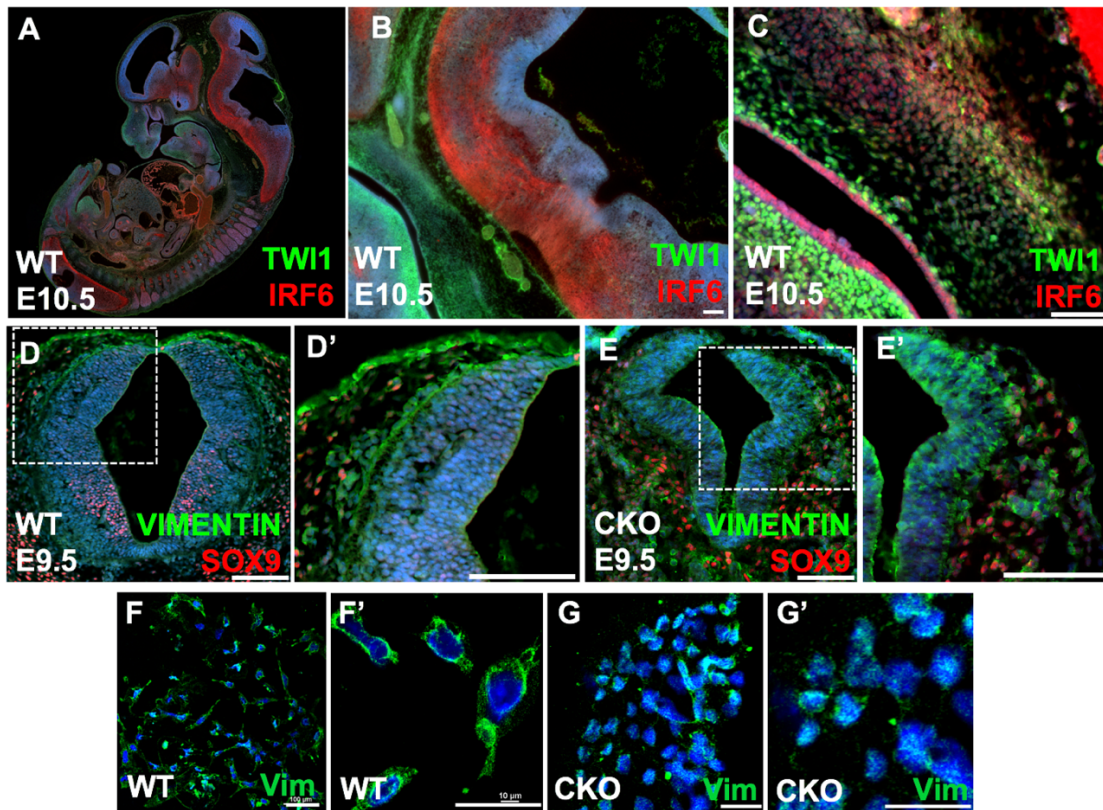

**Fig. S7.** Immunofluorescent staining of IRF6, TWIST1, SOX9, and VIMENTIN in the neural tube and CNCCs. (A-C) IRF6 is highly expressed in neural tube and oral epithelium, while TWIST1 is highly expressed in migratory mesenchymal cells along the neural tube and in frontonasal and pharyngeal arches. (D-D') SOX9 is expressed in neuroectodermal progenitors of glial cells in neural tube, while VIMENTIN is detected in migratory mesenchymal cells along the neural tube. (E, E') SOX9 was not observed in neural tube and VIMENTIN was highly expressed in neural tube and partially detached cells along the neural tube. (F-G') VIMENTIN is expressed in migratory CNCC emerged from neural tube explants of wild type and *Twist1*<sup>cko/-</sup> embryos.

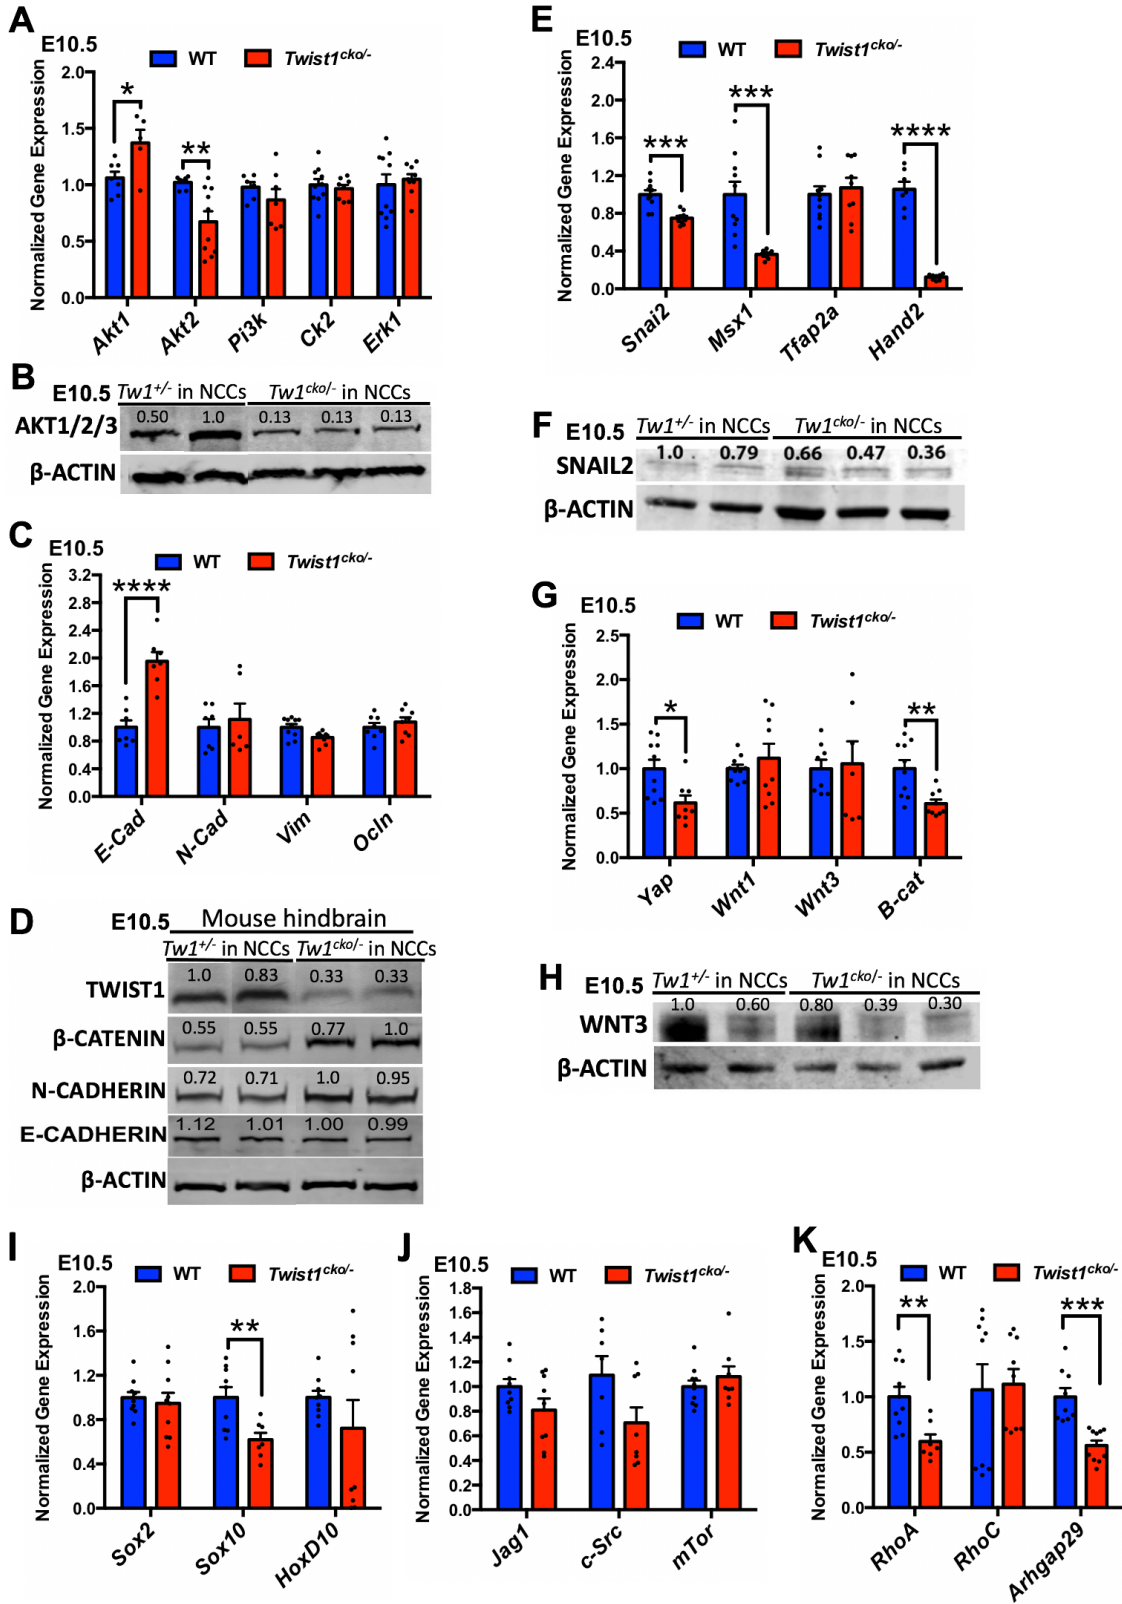



**Fig. S8. Differentially expressed genes in *Twist1*<sup>cko/-</sup> *in-vivo*.** (A) Comparison of the expression of *Akt1*, *Akt2*, and *Pi3k*, *Ck2* and *Erk1* mRNA between WT and *Twist1*<sup>cko/-</sup>. (B) Protein analysis by western showed a reduction in the kinase expression in mutant embryos at E10.5. (C) Comparison of the expression of *E-Cadherin* (adherens junction marker), *N-Cadherin*, *Vimentin* (mesenchymal marker), and *Occludin* mRNA in WT and *Twist1*<sup>cko/-</sup>. (D) Protein analysis by western showed that adherens and tight junction proteins are increased in mutant embryos at E13.5. (E) Comparison of the expression of *Snai2*, *Msx1*, *Tfap2a* and *Hand2* mRNA between WT and *Twist1*<sup>cko/-</sup>. (F) Protein analysis by western showed a reduction in the expression of SNAI2 transcription factor in mutant embryos at E10.5. (G) Comparison of the expression of *Yap*, *Wnt1*, *Wnt2*, *Wnt3* and  $\beta$ -*Catenin* mRNA in WT and *Twist1*<sup>cko/-</sup>. (H) Protein analysis by western showed that WNT3 protein is decreased in mutant embryos at E13.5. (I) mRNA expression of *Sox10* is significantly reduced in *Twist1*<sup>cko/-</sup> tissues compared to WT. (J) mRNA expression of *Jag1*, *c-Src* and *mTor* was not altered in *Twist1*<sup>cko/-</sup> compared to WT. (K) Comparison of the expression of *RhoA*, *RhoC*, and *Arhgap29* mRNA in WT and *Twist1*<sup>cko/-</sup>. The level of *RhoA* and *Arhgap29* is significantly reduced in *Twist1*<sup>cko/-</sup> embryos compared to WT.

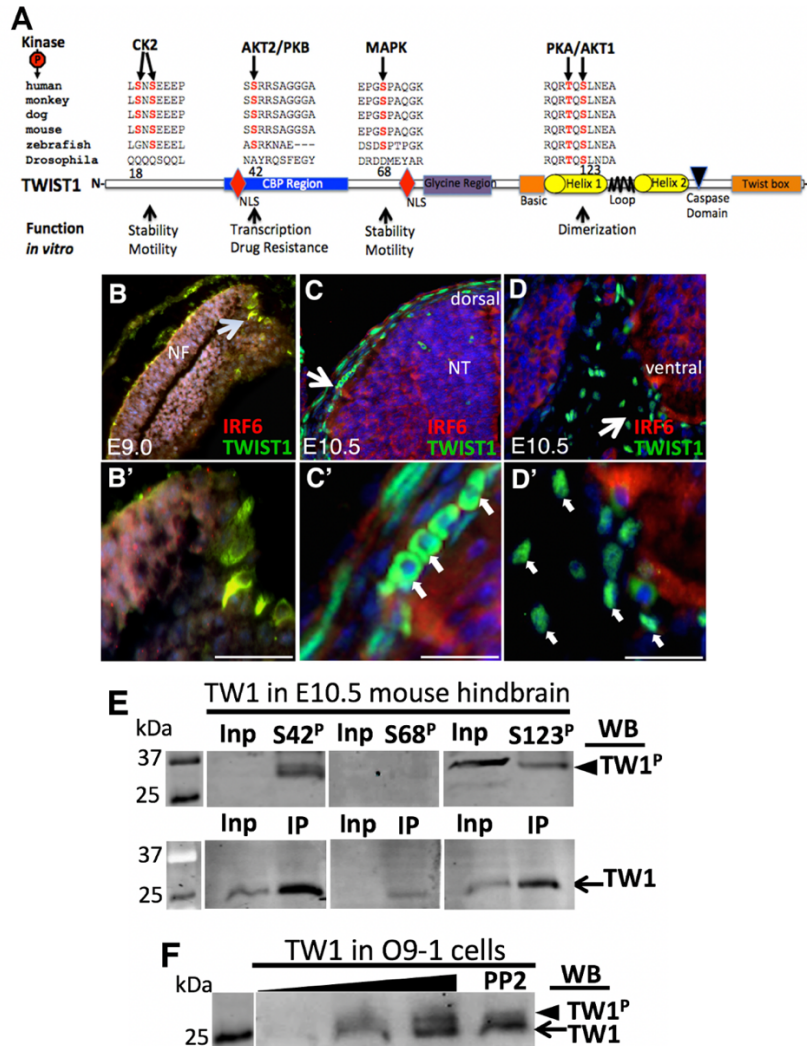

**Fig. S9. TWIST1 nuclear translocation and phosphorylation in CNCC.** (A) Mapping of phosphorylation sites within *TWIST1* functional domains and their respective kinases in cancer cell lines. *TWIST1* has 6 phospho-residues based on *in vitro* cancer studies. All are highly conserved, particularly T121 and S123. (B-D') *TWIST1* and IRF6 expression pattern in neural folds and CNCCs. (B-B') At E9.0, *TWIST1* is expressed in the cytosol of dorsal lateral cells of the neural folds (NF). (C-C') At E10.5, *TWIST1* is mostly cytosolic in pre-delamination CNCCs at the dorsal side of neural tube (NT). (D-D') *TWIST1* becomes nuclear when the CNCCs detach and migrate toward the pharyngeal arches. (E) Immunoblot showing *TWIST1* phosphorylated bands of S42, S68 and S123 (arrowhead) using polyclonal rabbit antibodies before immunoprecipitation (Input) and after enrichment (IP) using monoclonal *TWIST1* antibodies (bottom blot, row) in WT mouse embryo at E10.5. (F) *TWIST1* unphosphorylated (bottom arrow) and phosphorylated forms (arrowhead) are also highly expressed in O9-1 cells. Scale bars represent 50  $\mu$ m.

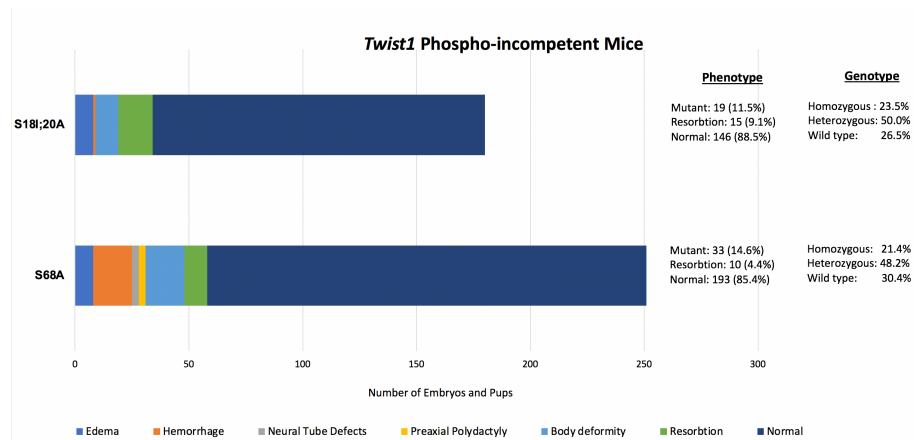

**Fig. S10.** The spectrum of craniofacial phenotype in the homozygous phospho-incompetent *Twist1*<sup>S18I;20A/S18I;20A</sup> and *Twist1*<sup>S68A/S68A</sup> embryos. Large numbers of embryos were collected from the two *Twist1* phospho-incompetent mouse lines to determine the ratio of genotype to phenotype and disease penetrance. The phenotype penetrance of the homozygous *Twist1*<sup>S18I;20A/S18I;20A</sup> and *Twist1*<sup>S68A/S68A</sup> mice was incomplete because the percentage of homozygous embryos and pups was 23.5% and 21.4%, respectively. However, the homozygous *Twist1*<sup>S18I;20A/S18I;20A</sup> and *Twist1*<sup>S68A/S68A</sup> embryos with phenotypes constitutes 11.5% and 14.6% of the total percentage, respectively, suggesting an incomplete penetrance of the phenotype. The percentage of mutant embryos is less than the estimated genotype percentage of the homozygous phospho-incompetent embryos.

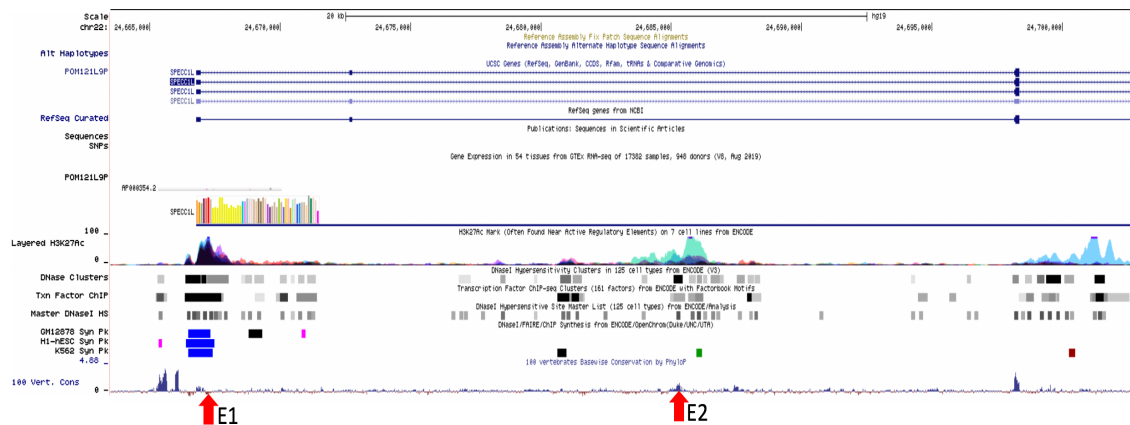

**Fig. S11.** A screenshot from UCSC Genome Browser showing the SPECC1L region. The two red arrows at the bottom indicate the genomic localization of putative enhancer elements E1 and E2 tested for TWIST1 binding. The two regions show enrichment for epigenetic enhancer signatures, including H3K27Ac, DNase I footprint, transcription factor signals, and conservation in 100 vertebrate species.

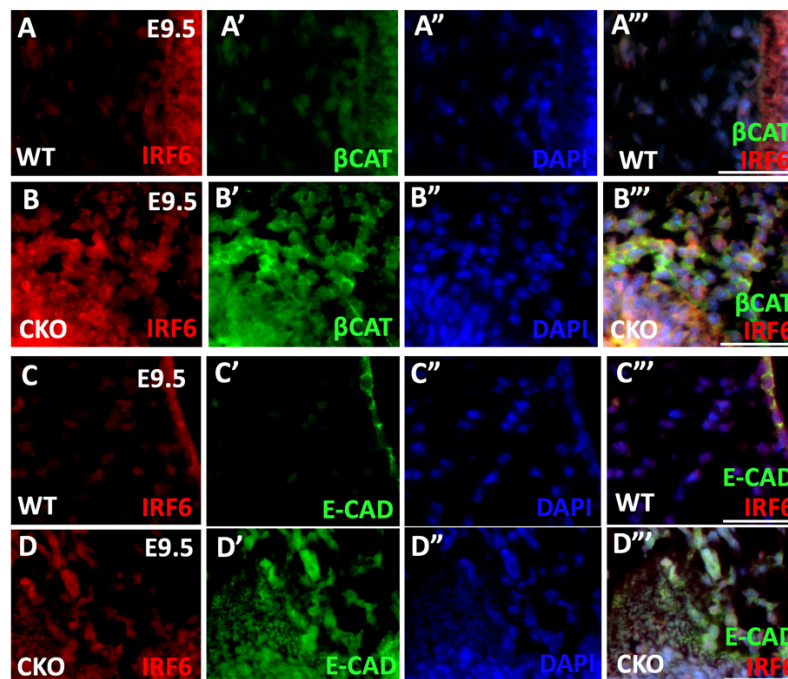

**Fig. S12.** Dual immunofluorescent staining of IRF6,  $\beta$ -CATENIN, and E-CAD in the neural tube and detached CNCCs. (A-A''') IRF6 and  $\beta$ -CATENIN are highly expressed in the neural tube with no detectable expression of IRF6 in CNCCs. (B-B''') IRF6 and  $\beta$ -CATENIN are highly expressed in neural tube and partially detached CNCCs. (C-C''') Similarly, IRF6 and E-CAD are highly expressed in the neural tube with a weak signal of IRF6 in CNCCs. (D-D''') IRF6 and E-CAD are highly expressed in the neural tube and in partially detached CNCCs.

**Table S1.** A list of genes and primers was used to quantify mRNA by RTqPCR, chromatin signal by ChIP-PCR, and cellular mRNA by *in situ* hybridization

| Genes             | Primer Sequence             |
|-------------------|-----------------------------|
| mSpecc1l.qPCR.F   | CCAAGGCCTTACCCGGTTT         |
| mSpecc1l.qPCR.R   | CCGGAGCAACAGGTCTTGAC        |
| mPrrx1.qPCR.F     | AACCTTCATCCTGGCATCCA        |
| mPrrx1.qPCR.R     | TGTGAAATTCCGCGAAGCT         |
| mJag1.qPCR.F      | TGGCCGAGGTCCTACACTTT        |
| mJag1.qPCR.R      | GCCGGCTAGGGTTTATCATG        |
| mMsx1.qPCR.F      | CCAGAAGATGCTCTGGTGAAG       |
| mMsx1.qPCR.R      | TTGGTCTTGTGCTTGCGTAG        |
| mYap1.qPCR.F      | GACTCGGAGACCGACTTGGA        |
| mYap1.qPCR.R      | AAGAAGGAGTCGGGCAGCTT        |
| mArhgap29.qPCR.F  | GCAAATCGTCCATGTTTCGT        |
| mArhgap29.qPCR.R  | CCAACCTCCGCCTTTTTTC         |
| mPi3k.qPCR.F      | GGCCCAGATGCTCTATTTGC        |
| mPi3k.qPCR.R      | CCACGTAGCAGTCGGGAAAG        |
| Wnt1-cre2.F       | ACAGCGAACCATGCTGCCTG        |
| Wnt1-cre2.R       | CATGTCCATCAGGTTCTTGC        |
| mSox2.qPCR.F      | AAA GGA GAG AAG TTT GGA GCC |
| mSox2.qPCR.R      | GGG CGA AGT GCA ATT GGG ATG |
| mSox10.qPCR.F     | TCT GGA GGT TGC TGA ACG AAA |
| mSox10.qPCR.R     | AGT CCG GAT GGT CCT TTT TGT |
| mHand2.qPCR.F     | GGC CAA GGA CGA CCA GAA C   |
| mHand2.qPCR.R     | CGT TGC TGC TCA CTG TGC TT  |
| mb-Catenin.qPCR.F | TGA CAC CTC CCA AGT CCT TT  |
| mb-Catenin.qPCR.R | TTG CAT ACT GCC CGT CAA T   |
| mC-Src.qPCR.F     | CGG AAT GTG CTG GTG TCT GA  |
| mC-Src.qPCR.R     | CAG GCG CTG TCC ATT TGA CT  |
| mRhoa.qPCR.F      | CAT TGA CAG CCC TGA TAG TT  |

|                |                               |
|----------------|-------------------------------|
| mRhoa.qPCR.R   | TCG TCA TTC CGA AGG TCC TT    |
| mRhoc.qPCR.F   | TCG AAG TGG ATG GCA AGC A     |
| mRhoc.qPCR.R   | ACG TCA GTG TCC GGG TAG GA    |
| mCk2.qPCR.F    | TTT CTG GAC AAG CTG CTT CGA T |
| mCk2.qPCR.R    | CAT TCG AGC CTG GTC CTT CA    |
| mmTor.qPCR.F   | CCA GGG GCT CCA ACG GCA AG    |
| mmTor.qPCR.R   | TCG TGG GGT CAG GCG GAA GA    |
| mAkt2R.qPCR.F  | CGG GCC TCT CCT TAT ACC CA    |
| mAkt2R.qPCR.R  | CTG CCC TGA GCT CAC TCA AG    |
| mAkt1.qPCR.F   | GGC TCA CCC AGT GAC AAC TCA   |
| mAkt1.qPCR.R   | CCC TTG CCC AGT AGC TTC AG    |
| mHoxd10.qPCR.F | GTG GAC TGC TCC CGT CTT TG    |
| mHoxd10.qPCR.R | TGT TCG GGT CTG TCC AAC TG    |
| mEcad.qPCR.F   | AATCCAACCCAGAGCTGCTC          |
| mEcad.qPCR.R   | TCATTTTCGGGGCAGCTGAT          |
| mNcad.qPCR.F   | CCATCCTGACAGACCCCAAC          |
| mNcad.qPCR.R   | GCACTTGGTTTTCTGCAGCA          |
| mOcln.qPCR.F   | GACTGGGCTGAACACTCCAA          |
| mOcln.qPCR.R   | ACATCACAGCTCACACCAGG          |
| mVim.qPCR.F    | GGATCAGCTCACCAACGACA          |
| mVim.qPCR.R    | TTCGGCTTCCTCTCTCTGGA          |
| mSnai1.qPCR.F  | CCTTCAGGCCACCTTCTTTG          |
| mSnai1.qPCR.R  | TGTGTCCAGTAACCACCCTG          |
| mSnai2.qPCR.F  | CCCTCCAAGTGCCTGTCTTA          |
| mSnai2.qPCR.R  | AGGCGTGGCTATTAACCGTA          |
| mWnt1.qPCR.F   | ATTCTTCTTCTGGGGTGGGG          |
| mWnt1.qPCR.R   | CCCGAGAGACAAGGAAAGGT          |
| mWnt3.qPCR.F   | TGTCCACCTTTACTACGCGT          |
| mWnt3.qPCR.R   | GAGCAGCCCATTCTTTCTGG          |
| mIrf6_qRT_F1   | AGTGTGGCCCAAACAGAAC           |

|                           |                        |
|---------------------------|------------------------|
| mIrf6_qRT_R1              | GGGTTGCTCACCGTCATAGT   |
| mTwist1 qPCR-set2         | CCCACTTTTTTGACGAAGAAT  |
| mTwist1 qPCR-set2         | TGATCCCAGCGTTTTTATTT   |
| mTfap2 $\alpha$ RTqPCR F1 | GAAGACTGCGAGGACCGTC    |
| mTfap2 $\alpha$ RTqPCR R1 | GAAGTCGGCATTAGGGGTGTG  |
| m18S.rRNA.qPCR.F          | GCAATTATTCCCCATGAACG   |
| m18s.rRNA.qPCR.R          | GGCCTCACTAAACCATCCAA   |
| mSpecc1l.Chlp.A.F         | TAAAACAGAGACGGCCAGGT   |
| mSpecc1l.Chlp.A.R         | GGGTTTCTCTGTGTAGCCCT   |
| mSpecc1l.Chlp.B.F         | ACATATTTCCCCAGCCCCAA   |
| mSpecc1l.Chlp.B.R         | AGGGGTCAAATAACTGCCA    |
| ISH, PP015 Tw1.F          | CCCTGGCAAGCAGTTCAGTCC  |
| ISH, PP015 Tw1.R          | TTCCTTCAGAGGAAGTATGGT  |
| mLrp2. RTqPCR F1          | GTCTAACCGCACTGTGATAGCC |
| mLrp2. RTqPCR R1          | CGGAAGTTTCCTCCAATGTGG  |
| mRab11b. RTqPCR F1        | TCAGATCTGGGACACTGCTG   |
| mRab11b. RTqPCR R1        | GGCTGAGGTCTCAATGAAGG   |
